# Supplementary material
Source: PubMed Central journal article supplement (PMC5204248)
Supplement: NIHMS834041-supplement-SupFig.pdf [file NIHMS834041-supplement-SupFig.pdf]

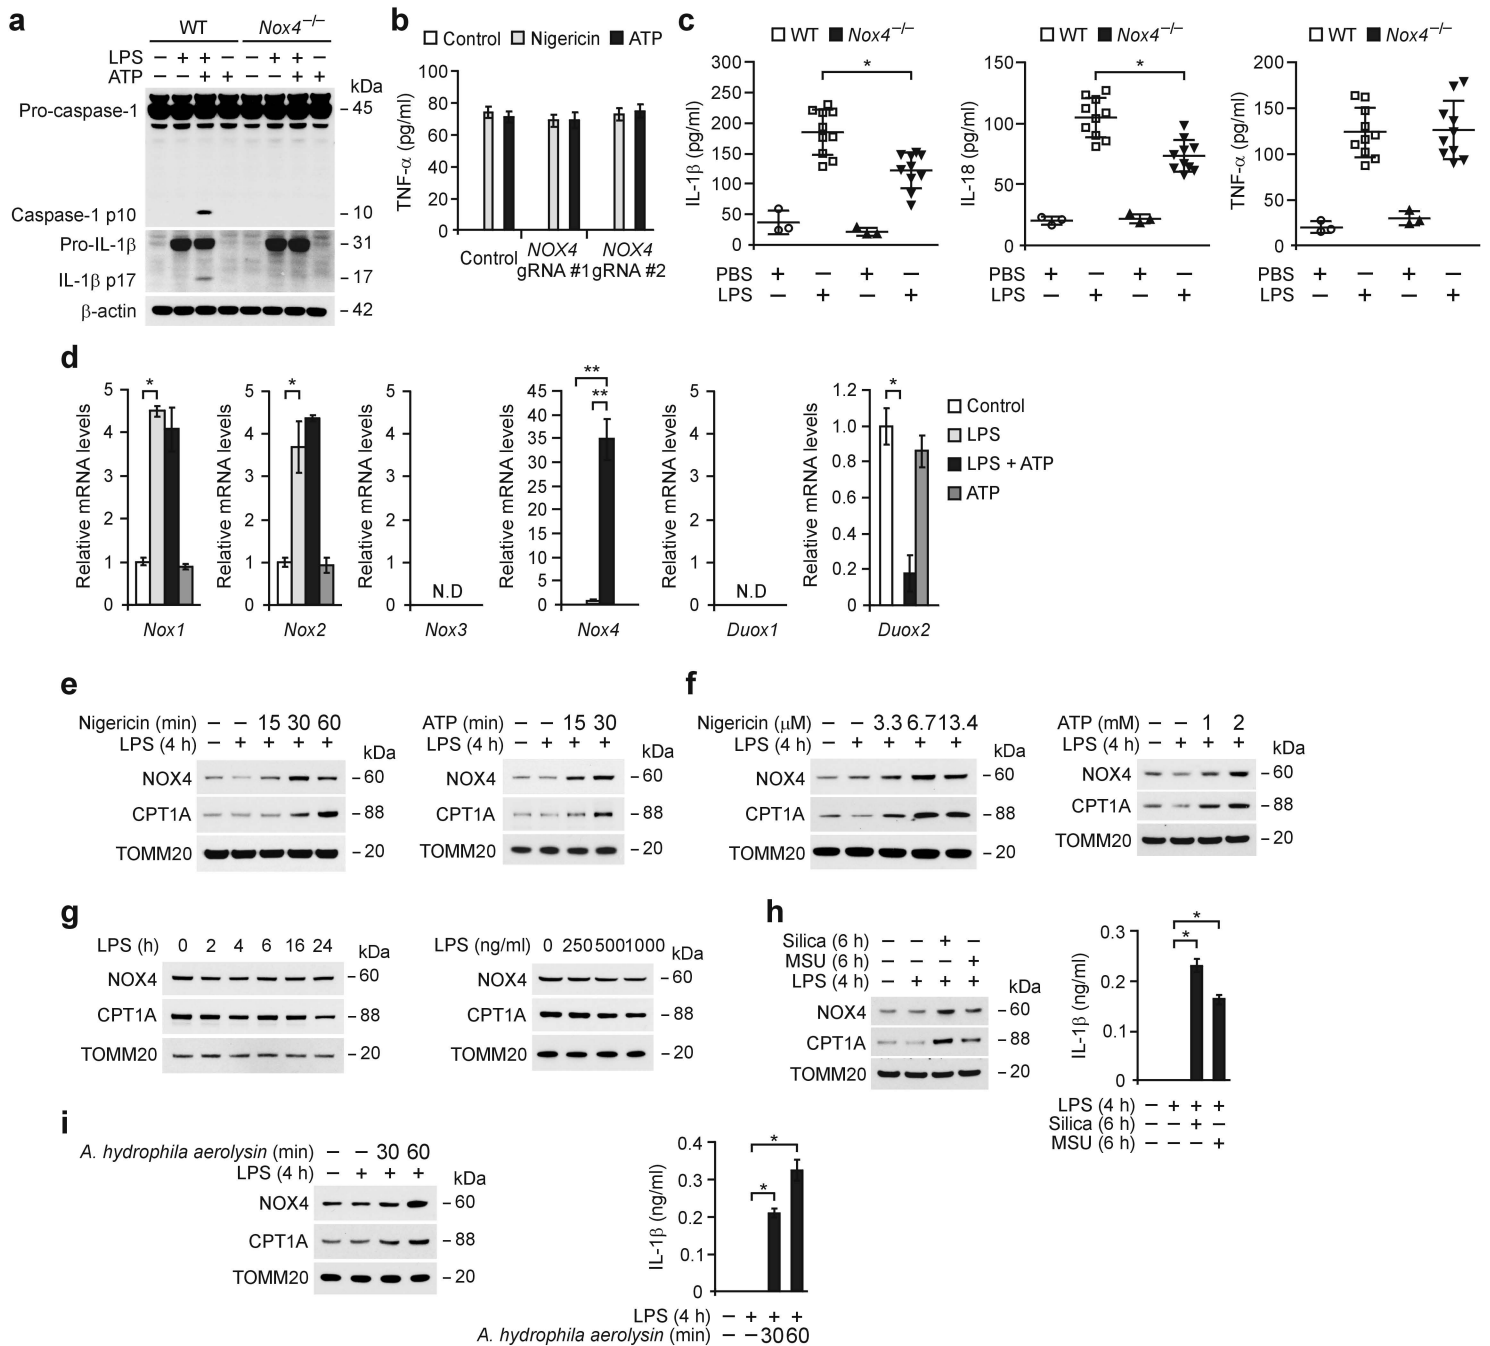

**Supplementary figure 1** NOX4 positively regulates NLRP3 inflammasome activation. (a) Immunoblot for caspase-1 and IL-1 $\beta$  from LPS-primed WT and *Nox4*<sup>-/-</sup> BMDMs stimulated with ATP. (b) ELISA for TNF- $\alpha$  from primary human macrophages transduced with lentivirus expressing two independent NOX4-target gRNAs (*NOX4* gRNA #1 and *NOX4* gRNA #2) or control plasmid (Control), and stimulated with LPS and nigericin or ATP. (c) ELISA for IL-1 $\beta$ , IL-18 and TNF- $\alpha$  in plasma of WT and *Nox4*<sup>-/-</sup> mice after intraperitoneal injection (i.p.) of LPS (10 mg/kg) or PBS for 24 h (PBS, *n* = 3 and LPS, *n* = 10). (d) Quantitative PCR for *Nox1*, *Nox2*, *Nox3*, *Nox4*, *Duox1* and *Duox2* gene from WT BMDMs treated with LPS and ATP. Not detected (N.D.). (e,f) Immunoblot for NOX4 and CPT1A in mitochondrial fraction from LPS-primed WT

BMDMs stimulated with nigericin or ATP. (g) Immunoblot for NOX4 and CPT1A in mitochondrial fraction from WT BMDMs incubated with LPS. (h,i) Immunoblot for NOX4 and CPT1A in mitochondrial fraction and ELISA for IL-1 $\beta$  from LPS-primed WT BMDMs stimulated with silica (200  $\mu$ M, 6 h), MSU (200  $\mu$ M, 6 h) or *A. hydrophila aerolysin* (10 ng/ml, 0, 30, 60 min).  $\beta$ -actin and TOMM20 served as the standard. Data are derived from *n* = 6 (a); *n* = 5 (d); *n* = 8 (e,f); *n* = 6 (g,h); *n* = 5 (i); mice and *n* = 3 (b) human subjects. All data are mean  $\pm$  s.d., \*\**P* < 0.01, \**P* < 0.05 by ANOVA. Data are representative of three independent experiments and each carried out in triplicate.

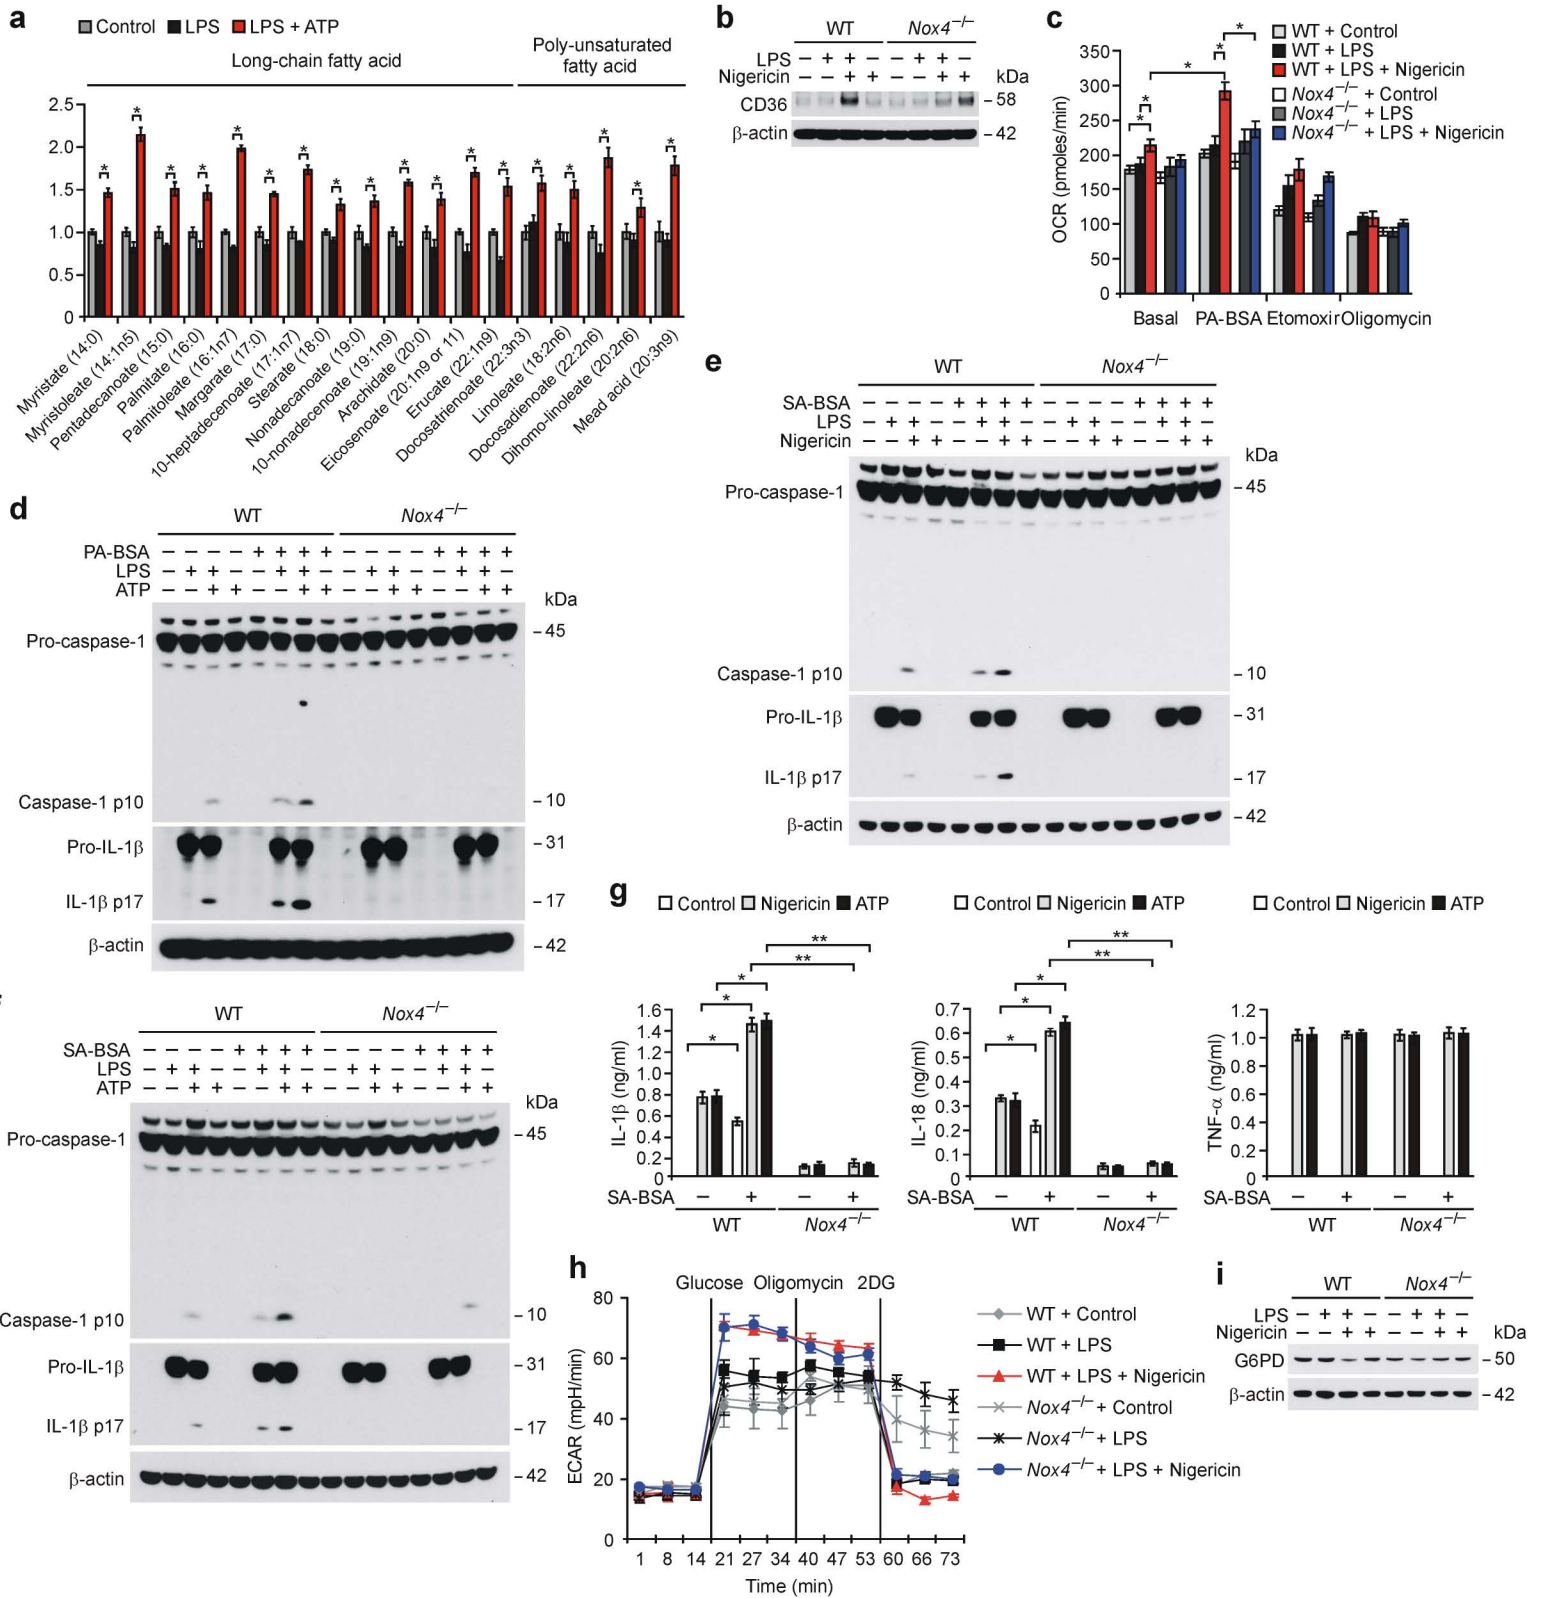

**Supplementary figure 2** NOX4 induces FAO in NLRP3 inflammasome activation. **(a)** Metabolon profiles in WT BMDMs stimulated with LPS and ATP. **(b)** Immunoblot analysis for CD36 in WT and *Nox4*<sup>-/-</sup> BMDMs stimulated with LPS and nigericin. **(c)** OCR in WT and *Nox4*<sup>-/-</sup> BMDMs stimulated with LPS and nigericin. **(d)** Immunoblot analysis for caspase-1 and IL-1 $\beta$  in WT and *Nox4*<sup>-/-</sup> BMDMs incubated with palmitate-BSA (PA-BSA) and ATP after LPS. **(e,f)** Immunoblot analysis for caspase-1 and IL-1 $\beta$  and **(g)** ELISA for IL-1 $\beta$ , IL-18 and TNF- $\alpha$  in WT and *Nox4*<sup>-/-</sup> BMDMs incubated with stearic acid-BSA (SA-BSA) and

nigericin or ATP after LPS. **(h)** ECAR in WT and *Nox4*<sup>-/-</sup> BMDMs stimulated with LPS and nigericin. **(i)** Immunoblot analysis for G6PD in WT and *Nox4*<sup>-/-</sup> BMDMs stimulated with LPS and nigericin.  $\beta$ -actin served as the standard. Data are derived from  $n = 12$  **(a)**;  $n = 3$  **(b)**;  $n = 6$  **(c)**;  $n = 5$  **(d)**;  $n = 8$  **(e,f)**;  $n = 6$  **(g)**;  $n = 3$  **(h,i)** mice. All data are mean  $\pm$  s.d., \*\* $P < 0.01$ , \* $P < 0.05$  by ANOVA. Data are representative of three independent experiments and each carried out in triplicate.

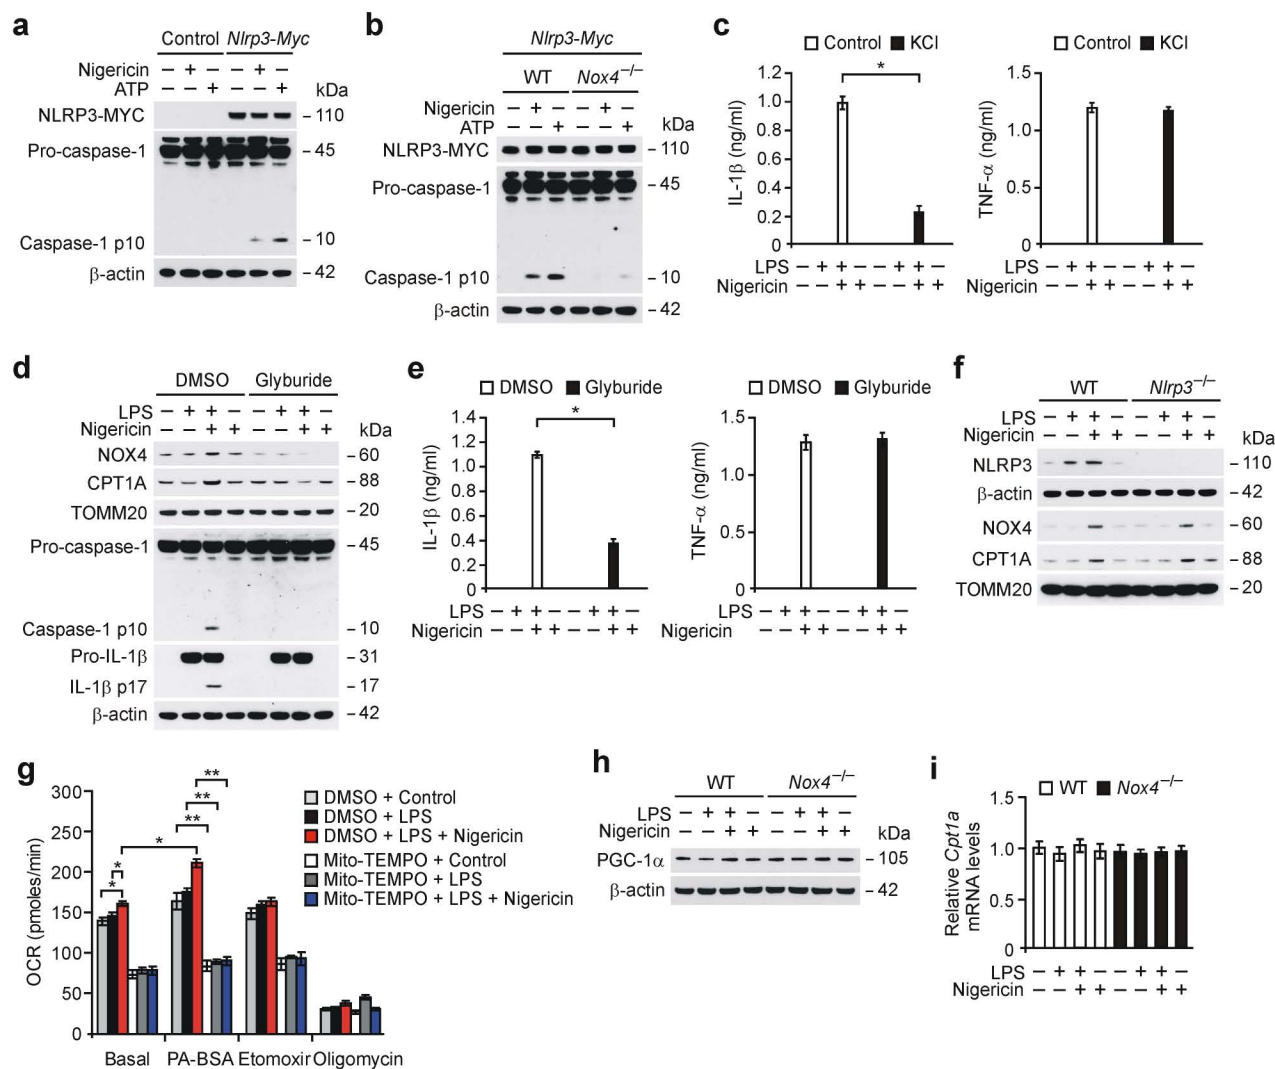

**Supplementary figure 3** NOX4-dependent FAO positively regulates NLRP3 inflammasome activation. (a) Immunoblot for NLRP3 and caspase-1 from control and *Nlrp3* over-expressed BMDMs stimulated with nigericin or ATP. (b) Immunoblot for NLRP3 and caspase-1 from control and *Nlrp3* over-expressed WT and *Nox4<sup>-/-</sup>* BMDMs stimulated with nigericin or ATP. (c) ELISA for IL-1β and TNF-α from WT BMDMs pre-treated with KCl (100 mM, 1 h) before nigericin stimulation after LPS. (d) Immunoblot for NOX4 and CPT1A in mitochondrial fraction, caspase-1 and IL-1β in cytosolic fraction and (e) ELISA for IL-1β and TNF-α from WT BMDMs pre-treated with Glyburide (200 μM, 1 h) before nigericin stimulation after LPS. (f) Immunoblot for NLRP3 in cytosolic fraction, NOX4 and

CPT1A in mitochondrial fraction from LPS-primed WT and *Nlrp3<sup>-/-</sup>* BMDMs stimulated with nigericin. (g) OCR in WT BMDMs pre-treated with Mito-TEMPO (100 μM, 1 h) before nigericin stimulation after LPS. (h) Immunoblot analysis for PGC-1α and (i) Quantitative PCR for *Cpt1a* gene expression from LPS-primed WT and *Nox4<sup>-/-</sup>* BMDMs stimulated with nigericin. β-actin and TOMM20 served as the standard. Data are derived from  $n = 3$  (a);  $n = 5$  (b);  $n = 6$  (c);  $n = 3$  (d,e);  $n = 3$  (f);  $n = 5$  (g);  $n = 3$  (h,i) mice. All data are mean ± s.d., \*\* $P < 0.01$ , \* $P < 0.05$  by ANOVA. Data are representative of three independent experiments and each carried out in triplicate.

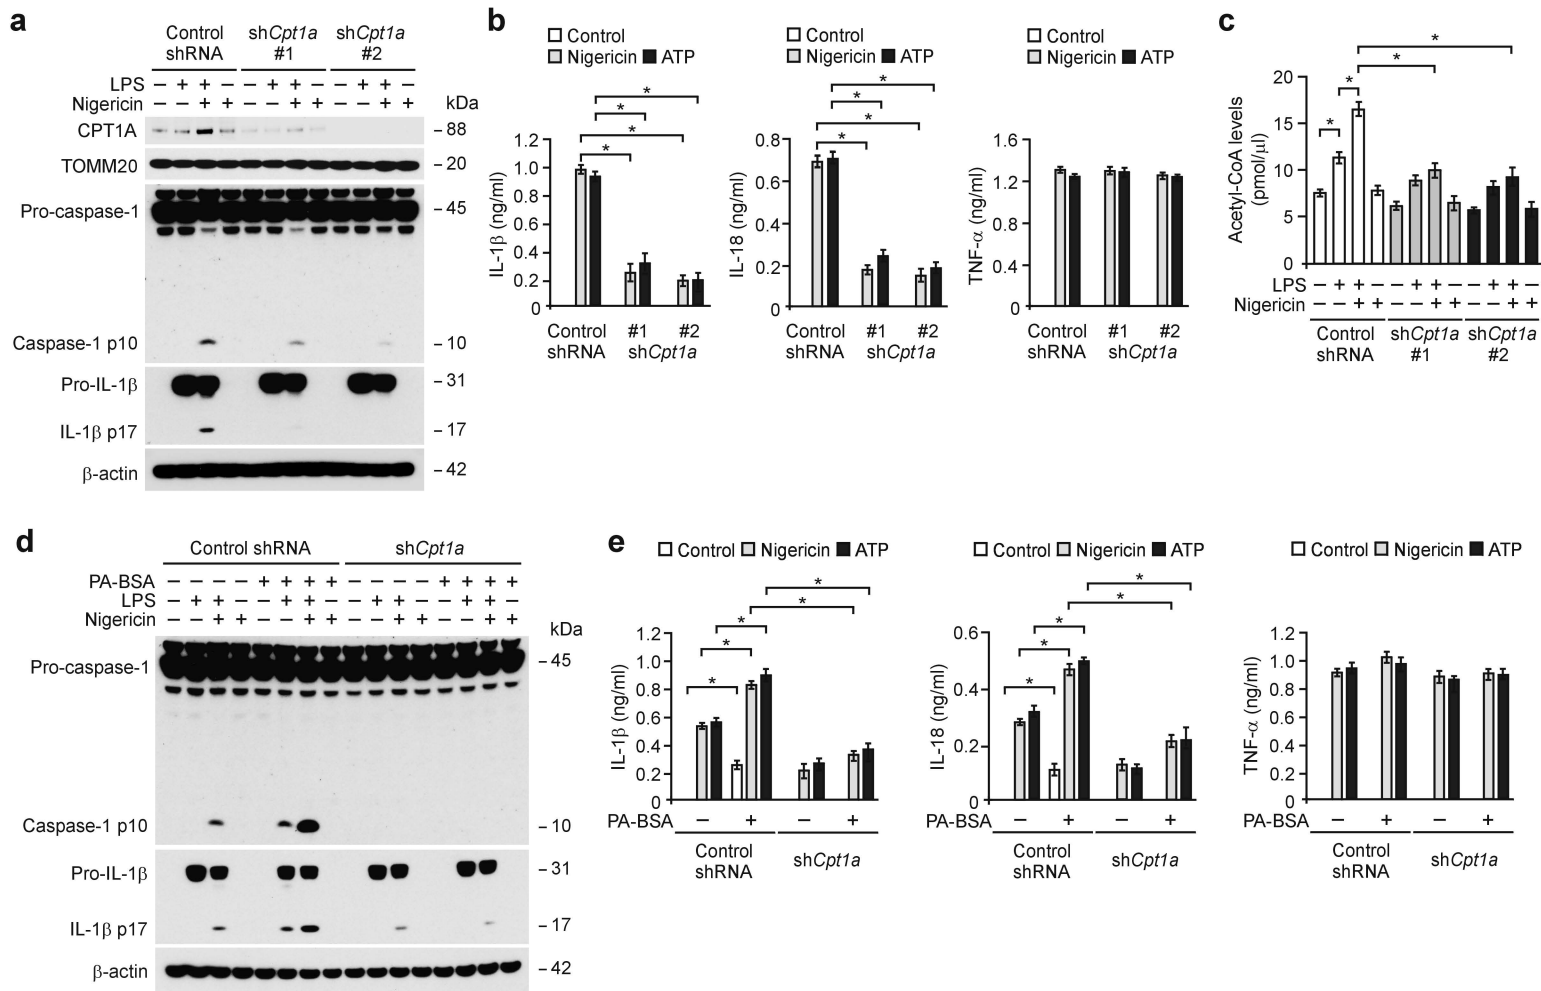

**Supplementary figure 4** CPT1A positively regulates NLRP3 inflammasome activation. (a) Immunoblot analysis for CPT1A in mitochondrial fraction, caspase-1 and IL-1 $\beta$  cytosolic fraction and (b) ELISA for IL-1 $\beta$ , IL-18 and TNF- $\alpha$  and (c) Intracellular acetyl-CoA levels from WT peritoneal macrophages transduced with lentivirus expressing non-target shRNA (Control shRNA) or two independent shRNAs for *Cpt1a* (sh*Cpt1a*#1 and sh*Cpt1a*#2), and stimulated with LPS and nigericin or ATP. (d) Immunoblot analysis for caspase-1 and IL-1 $\beta$  and (e) ELISA for IL-1 $\beta$ , IL-18 and TNF- $\alpha$  from WT peritoneal

macrophages transduced with lentivirus expressing non-target shRNA (Control shRNA) or shRNAs for *Cpt1a* (sh*Cpt1a*), and incubated with palmitate-BSA (PA-BSA) and nigericin after LPS.  $\beta$ -actin and TOMM20 served as the standard. Data are derived from  $n = 10$  (a);  $n = 6$  (b,c);  $n = 10$  (d);  $n = 6$  (e) mice. All data are mean  $\pm$  s.d., \* $P < 0.05$  by ANOVA. Data are representative of three independent experiments and each carried out in triplicate.

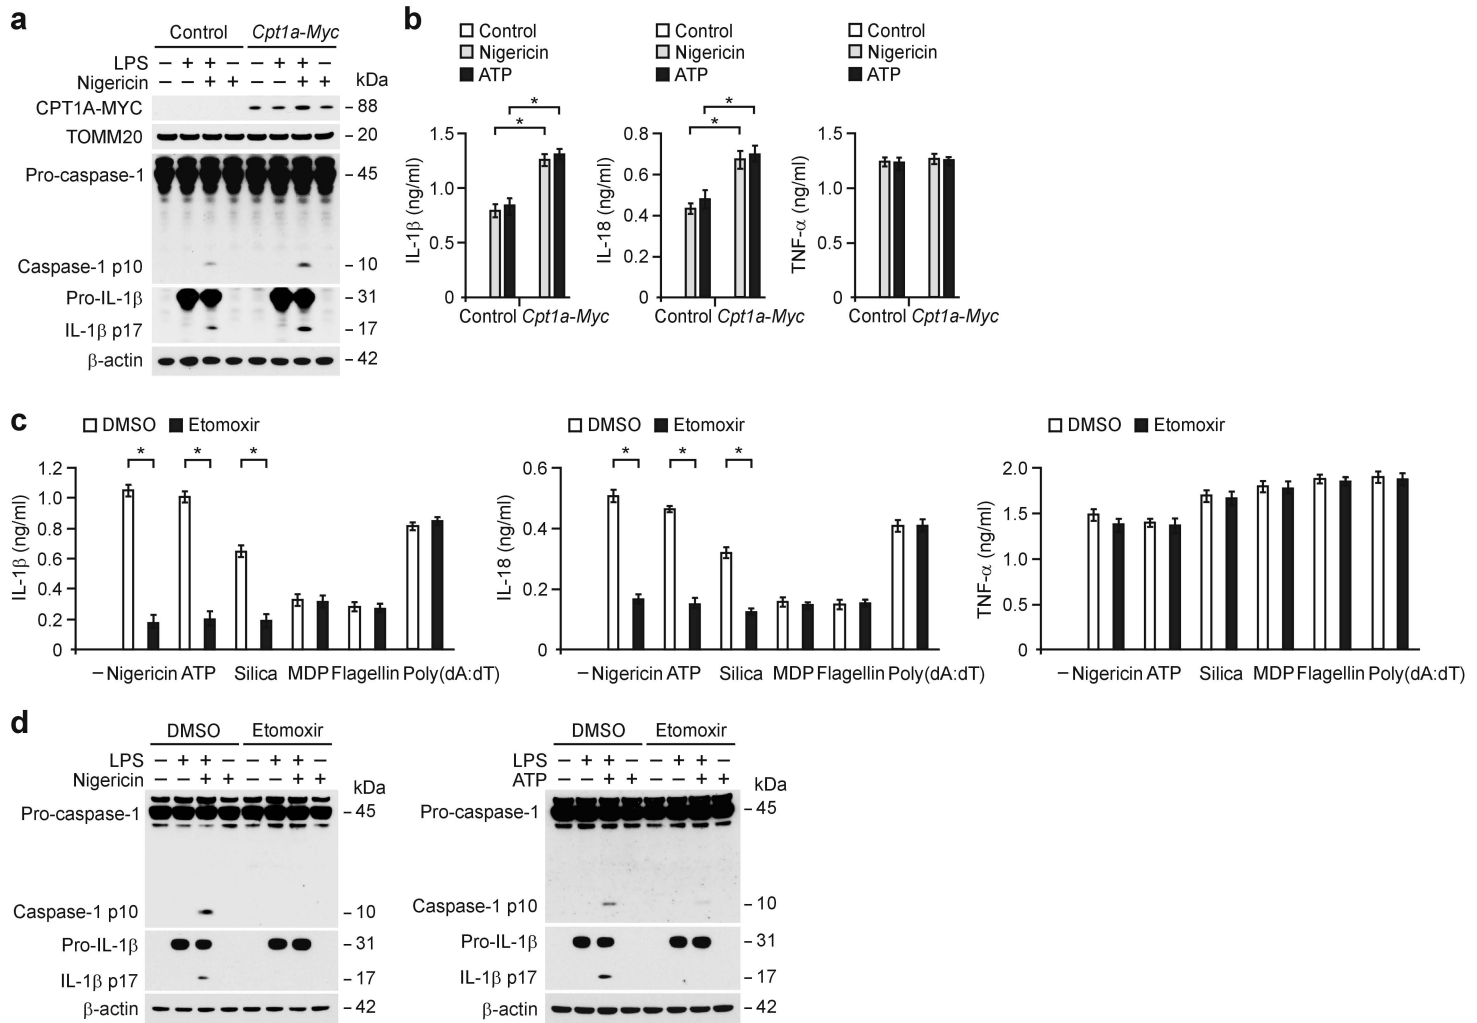

**Supplementary figure 5** Inhibition of CPT1A suppresses NLRP3 inflammasome activation. (a) Immunoblot analysis for CPT1A in mitochondrial fraction, caspase-1 and IL-1 $\beta$  in cytosolic fraction and (b) ELISA for IL-1 $\beta$ , IL-18 and TNF- $\alpha$  from control and *Cpt1a* over-expressed WT BMDMs stimulated with LPS and nigericin. (c) ELISA for IL-1 $\beta$ , IL-18 and TNF- $\alpha$  in WT BMDMs pre-treated with etomoxir (200  $\mu$ M, 2 h) or DMSO before nigericin, ATP, silica, MDP, flagellin or poly(dA:dT) stimulation after LPS. (d) Immunoblot analysis for caspase-1 and IL-1 $\beta$  from WT

BMDMs pre-treated with etomoxir or DMSO before nigericin or ATP stimulation after LPS.  $\beta$ -actin and TOMM20 served as the standard. Data are derived from  $n = 6$  (a, b);  $n = 5$  (c);  $n = 6$  (d) mice. All data are mean  $\pm$  s.d., \* $P < 0.05$  by ANOVA. Data are representative of three independent experiments and each carried out in triplicate.

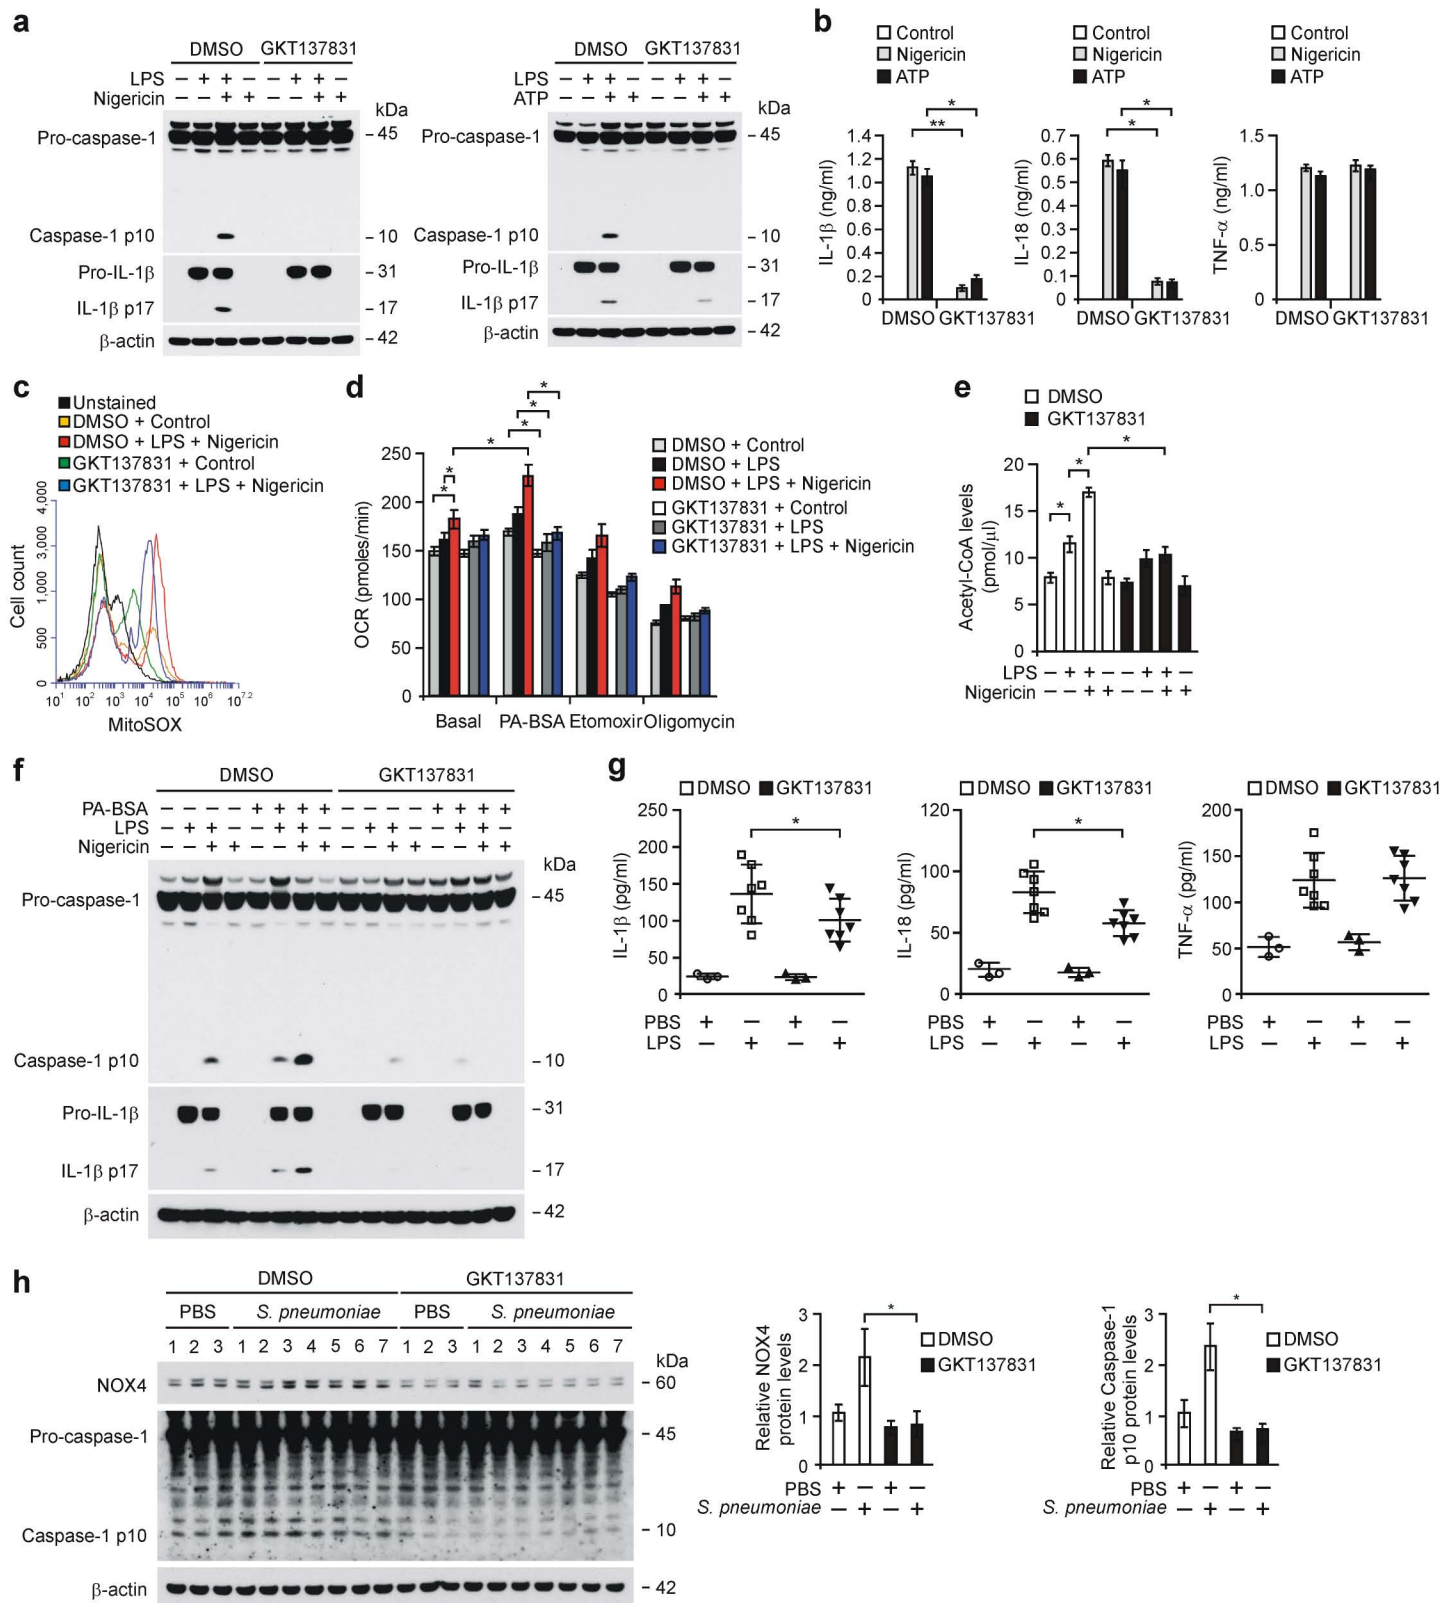

**Supplementary figure 6** GKT137831 suppresses NLRP3 inflammasome activation. (a) Immunoblot for caspase-1 and IL-1 $\beta$  and (b) ELISA for IL-1 $\beta$ , IL-18 and TNF- $\alpha$  from WT BMDMs pre-treated with GKT137831 (20  $\mu$ M, 2 h) or DMSO before nigericin or ATP stimulation after LPS. (c) Flow cytometry analysis of WT peritoneal macrophages stained with MitoSOX and treated with GKT137831 (20  $\mu$ M, 1 h) before LPS and nigericin stimulation. (d) OCR in WT BMDMs pre-treated with GKT137831 (20  $\mu$ M, 2 h) before nigericin stimulation after LPS. (e) Intracellular acetyl-CoA levels in WT BMDMs pre-treated with GKT137831 (20  $\mu$ M, 1 h) before LPS and nigericin stimulation. (f) Immunoblot for caspase-1 and IL-1 $\beta$  from WT BMDMs pre-treated with

GKT137831 (20  $\mu$ M, 2 h) before palmitate-BSA (PA-BSA) and nigericin incubation after LPS. (g) ELISA for IL-1 $\beta$ , IL-18 and TNF- $\alpha$  in plasma of WT mice after i.p. of GKT137831 (20 mg/kg, 3 h) then i.p. of LPS (10 mg/kg) or PBS for 24 h (PBS,  $n = 3$  and LPS,  $n = 7$ ). (h) Immunoblot for NOX4 and caspase-1 in lung tissues from WT mice after i.p. of GKT137831, then infection of *S. pneumoniae* or PBS for 24 h.  $\beta$ -actin served as the standard. Data are derived from  $n = 6$  (a, b);  $n = 3$  (c);  $n = 6$  (d);  $n = 3$  (e);  $n = 4$  (f) mice. All data are mean  $\pm$  s.d., \*\* $P < 0.01$ , \* $P < 0.05$  by ANOVA. Data are representative of three independent experiments and each carried out in triplicate.

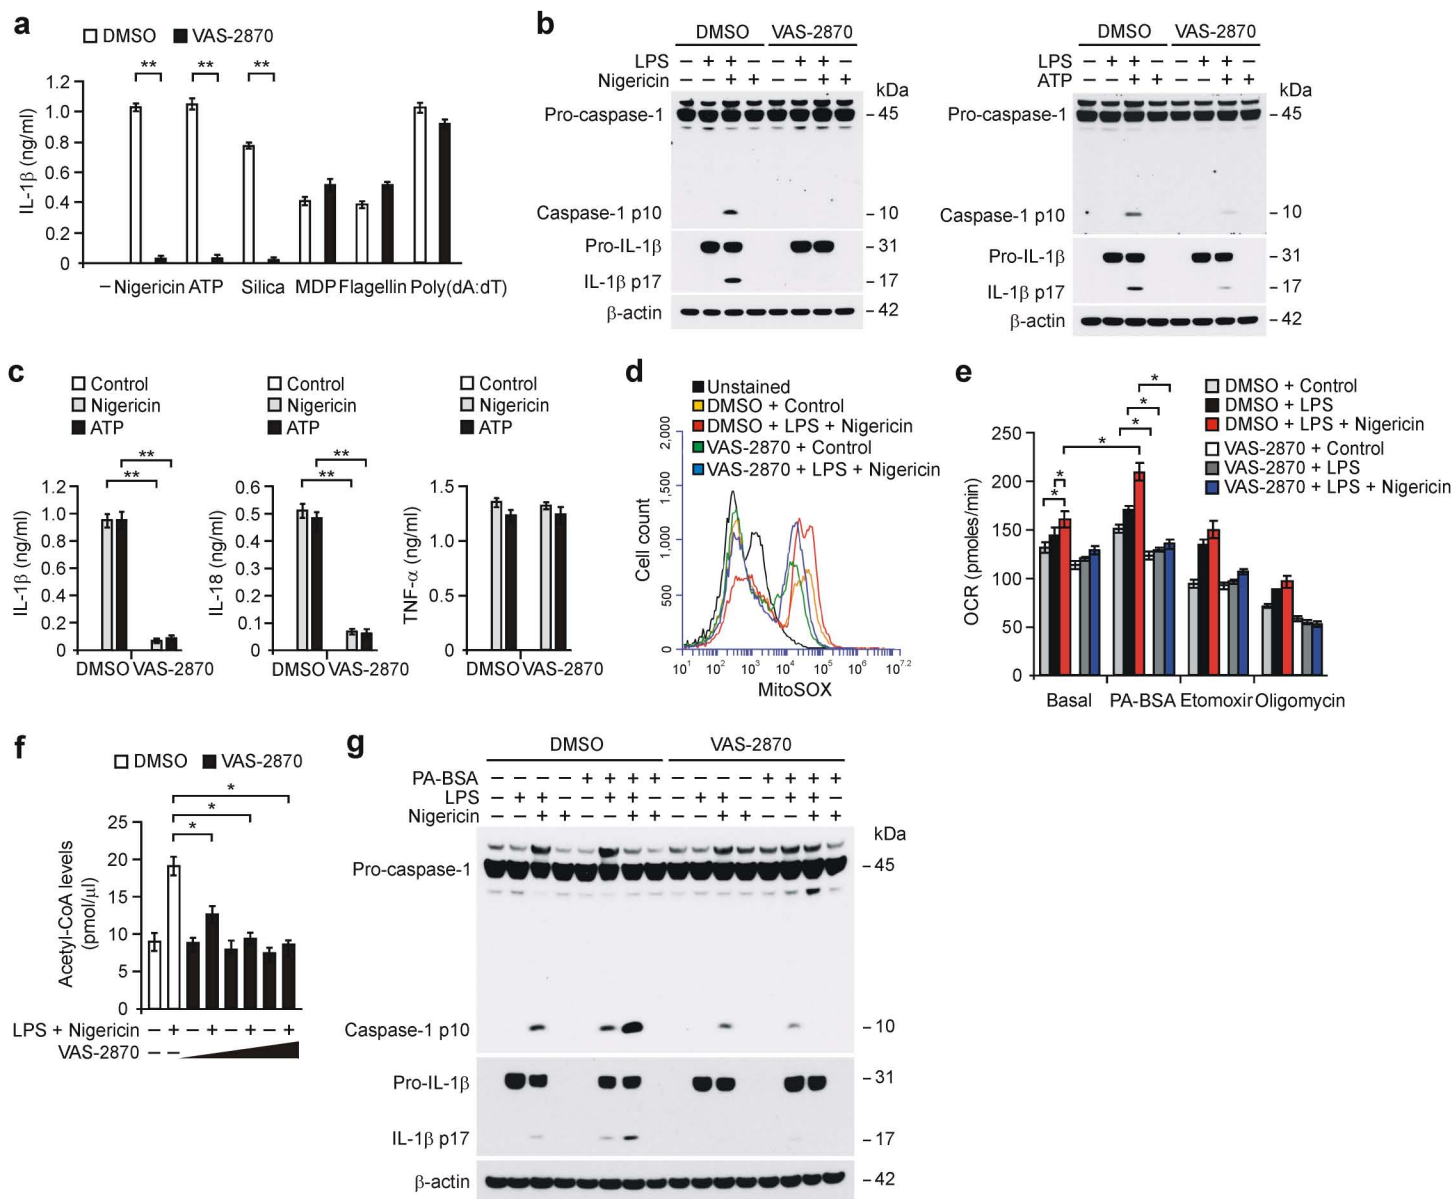

**Supplementary figure 7** VAS-2870 suppresses NLRP3 inflammasome activation. **(a)** ELISA for IL-1 $\beta$  in WT peritoneal macrophages pre-treated with VAS-2870 (1  $\mu$ M, 2 h) before nigericin, ATP, silica, MDP, flagellin or poly(dA:dT) stimulation after LPS. **(b)** Immunoblot analysis for caspase-1 and IL-1 $\beta$  from WT BMDMs pre-treated with VAS-2870 before nigericin or ATP stimulation after LPS. **(c)** ELISA for IL-1 $\beta$ , IL-18 and TNF- $\alpha$  from WT BMDMs pre-treated with VAS-2870 before nigericin or ATP stimulation after LPS. **(d)** Flow cytometry analysis of WT peritoneal macrophages stained with MitoSOX and then treated with VAS-2870 before LPS and nigericin stimulation. **(e)** OCR in WT BMDMs pre-treated with VAS-2870 (0.5  $\mu$ M, 2 h) before nigericin stimulation after LPS.

**(f)** Intracellular acetyl-CoA levels in WT BMDMs pre-treated with VAS-2870 (0, 0.5, 1, 2  $\mu$ M, 2 h) before nigericin stimulation after LPS. **(g)** Immunoblot analysis for caspase-1 and IL-1 $\beta$  from WT BMDMs pre-treated with VAS-2870 (1  $\mu$ M, 2 h) before palmitate-BSA (PA-BSA) and nigericin incubation after LPS.  $\beta$ -actin served as the standard. Data are derived from  $n = 10$  **(a)**;  $n = 5$  **(b,c)**;  $n = 3$  **(d)**;  $n = 3$  **(e)**;  $n = 3$  **(f,g)** mice. All data are mean  $\pm$  s.d.,  $^{**}P < 0.01$ ,  $^{*}P < 0.05$  by ANOVA. Data are representative of three independent experiments and each carried out in triplicate.

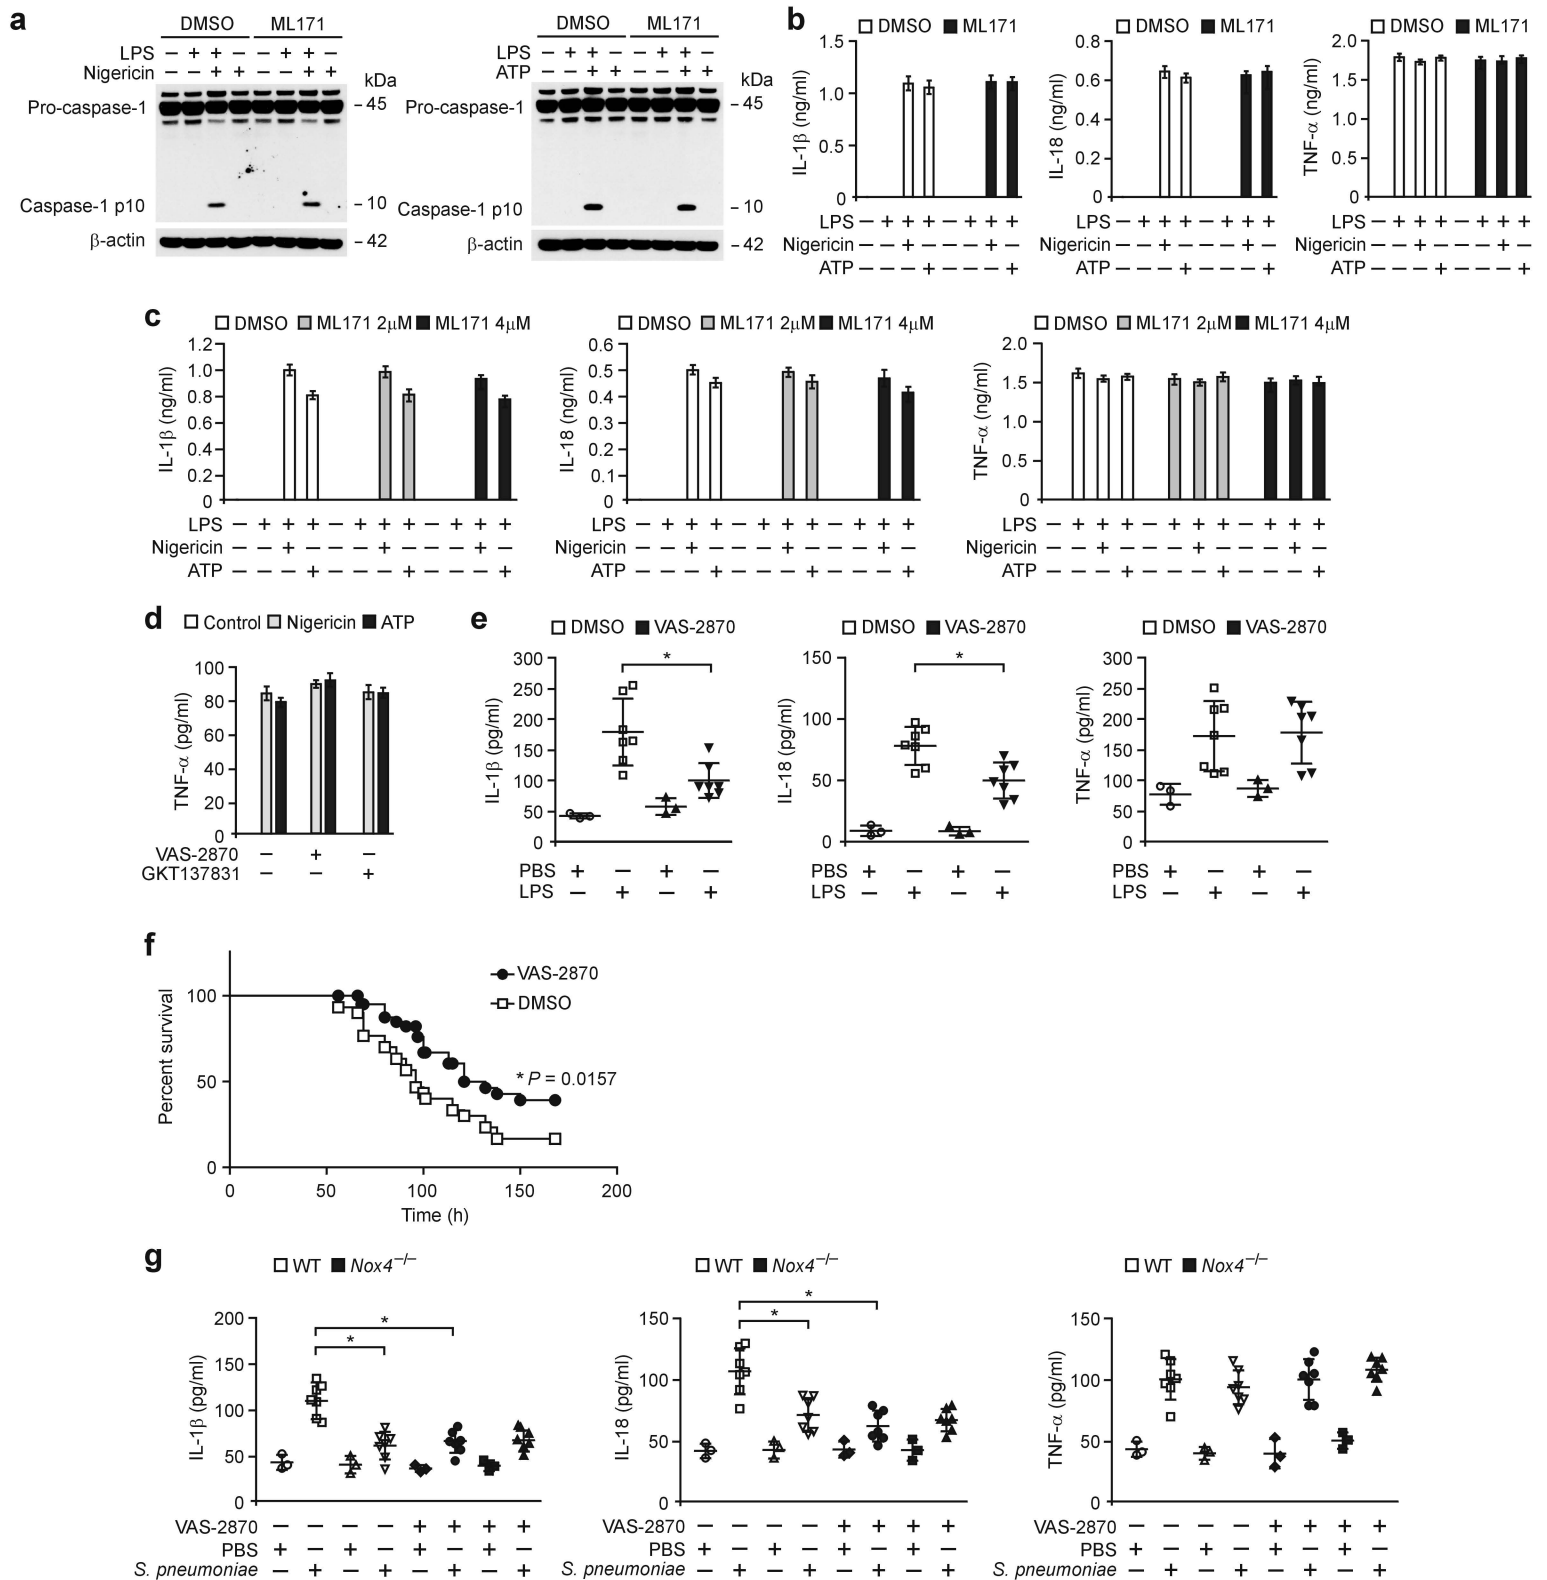

**Supplementary figure 8** Inhibition of NOX4 suppresses NLRP3 inflammasome activation. (a) Immunoblot for caspase-1 and (b) ELISA for IL-1 $\beta$ , IL-18 and TNF- $\alpha$  from WT peritoneal macrophages pre-treated with ML171 (1  $\mu$ M, 2 h) or DMSO before nigericin or ATP stimulation after LPS. (c) ELISA for IL-1 $\beta$ , IL-18 and TNF- $\alpha$  from WT peritoneal macrophages pre-treated with ML171 (2 or 4  $\mu$ M, 2 h) for before nigericin or ATP stimulation after LPS. (d) ELISA for TNF- $\alpha$  from primary human macrophages pre-treated with GKT137831 (20  $\mu$ M, 1 h), VAS-2870 (20  $\mu$ M, 1 h) or DMSO before nigericin or ATP stimulation after LPS. (e) ELISA for IL-1 $\beta$ , IL-18 and TNF- $\alpha$  in plasma from WT mice after intraperitoneal injection (i.p.) of VAS-2870 (10 mg/kg, 6 h) or DMSO, then i.p. of LPS (10 mg/kg, 24 h)

or PBS (PBS,  $n = 3$  and LPS,  $n = 7$ ). (f) Survival curve was determined from WT mice treated with VAS-2870 (10 mg/kg) or DMSO by i.p. at 12 h after *S. pneumoniae* infection (Control,  $n = 30$  and VAS-2870,  $n = 30$ ,  $P = 0.0157$  by log-rank test). (g) ELISA for IL-1 $\beta$ , IL-18 and TNF- $\alpha$  in lung tissues from WT and *Nox4*<sup>-/-</sup> mice after i.p. of VAS-2870 (10 mg/kg, 3 h) or DMSO, then infection of *S. pneumoniae* or PBS for 24 h (PBS,  $n = 3$  and *S. pneumoniae*,  $n = 7$ ).  $\beta$ -actin served as the standard. Data are derived from  $n = 3$  (a,b);  $n = 5$  (c) mice;  $n = 3$  (d) human subjects. All data are mean  $\pm$  s.d., \* $P < 0.05$  by ANOVA. Data are representative of three independent experiments and each carried out in triplicate.
